# Supplementary material for: An Alternative Exploitation of Synechocystis sp. PCC6803: A Cascade Approach for the Recovery of High Added-Value Products
Source: Molecules. 2023 Mar 31;28(7):3144. doi: 10.3390/molecules28073144 (PMC10095798; doi:10.3390/molecules28073144)
Supplement: Supplementary file 1 [file molecules-28-03144-s001.zip › molecules-2250872-supplementary2.pdf]

## An alternative exploitation of *Synechocystis* sp. PCC6803: a cascade approach for the recovery of high added-value products

Paola Imbimbo <sup>1</sup>, Luigi D'Elia <sup>1</sup>, Iolanda Corrado <sup>1</sup>, Gerardo Alvarez-Rivera <sup>2</sup>, Antonio Marzocchella <sup>3</sup>, Elena Ibáñez <sup>2</sup>, Cinzia Pezzella <sup>1</sup>, Filipe Branco dos Santos <sup>4</sup> and Daria Maria Monti <sup>1,\*</sup>

\*Correspondence: mdmonti@unina.it (D.M.M.); Tel.: +39 081 679150

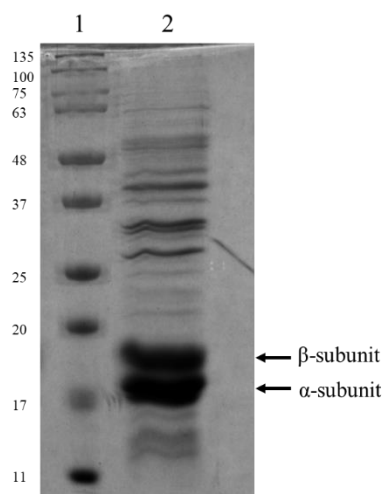

**Figure S1. Protein extraction from *Synechocystis* sp. PCC6803.** SDS-PAGE analysis of protein extract after sonication. Lane 1: molecular weight markers; lane 2: 30  $\mu$ g of total soluble proteins. After electrophoresis, the gel was stained with Coomassie-Blue Brilliant.

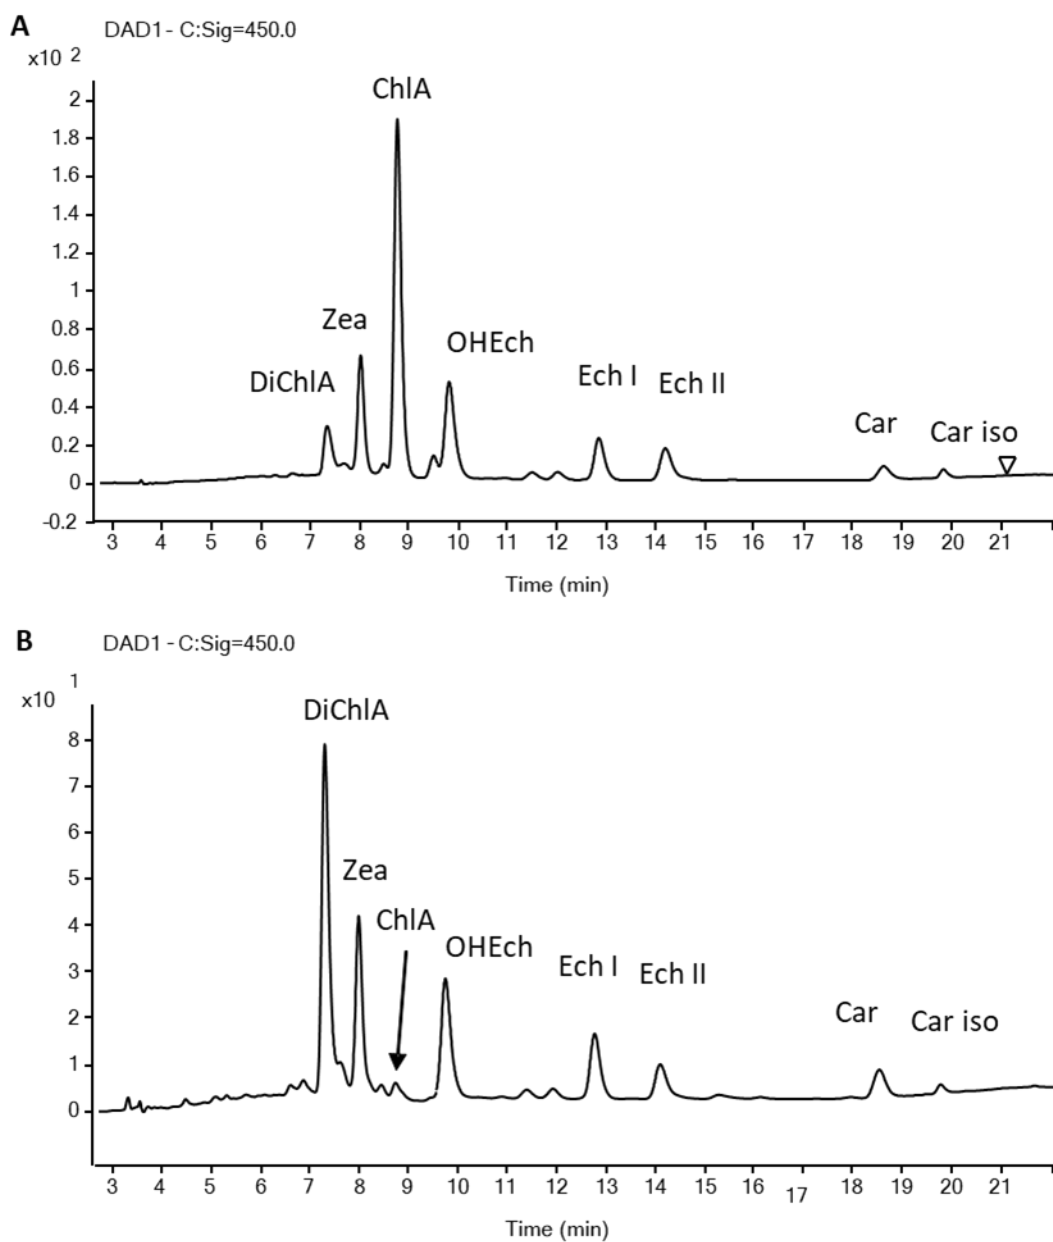

**Figure S2. Carotenoids identification.** Annotated HPLC-DAD chromatograms obtained at 450 nm for the extracts of *Synechocystis* sp. PCC6803 raw biomass (**A**) and *Synechocystis* sp. PCC6803 residual biomass (**B**).

**Table S1.** Tentatively identification of compounds from *Synechocystis* sp. PCC6803 by HPLC-DAD-APCI-QTOF analysis. Peak annotation, high-resolution mass spectrometry features and UV–Vis maxima are reported.

| Peak    | RT (min) | Identification       | Monoisotopic mass | Theoretical $[M + H]^+ m/z$ | Experimental $[M + H]^+ m/z$ | Error (ppm) | UV–Vis maxima (nm) |
|---------|----------|----------------------|-------------------|-----------------------------|------------------------------|-------------|--------------------|
| DiChlA  | 7.419    | Divinylchlorophyll A | 890.5197          | 891.5269                    | 891.5260                     | -1.06       | 340s, 380s, 428    |
| Zea     | 8.057    | Zeaxanthin           | 568.4280          | 569.4353                    | 569.4346                     | -1.24       | 420s, 445, 480     |
| ChlA    | 8.778    | Chlorophyll A        | 892.5353          | 893.5426                    | 893.5450                     | 2.69        | 340, 380s, 430     |
| OHEch   | 9.826    | Hydroxyechinenone    | 566.4124          | 567.4197                    | 567.4191                     | -0.98       | 420s, 445, 476     |
| Ech I   | 12.884   | Echinenone I         | 550.4175          | 551.4247                    | 551.4234                     | -2.43       | 460                |
| Ech II  | 14.237   | Echinenone II        | 550.4175          | 551.4247                    | 551.4251                     | 0.65        | 460                |
| Caro    | 18.650   | $\beta$ -Carotene    | 536.4382          | 537.4455                    | 537.4452                     | -0.52       | 420s, 450, 480     |
| Car iso | 19.800   | Carotene isomer      | 536.4382          | 537.4455                    | 537.4440                     | -2.75       | 420s, 450, 480     |
